# Supplementary material for: Thermodynamic Characterization of the Interaction of Biofunctionalized Gold Nanoclusters with Serum Albumin Using Two- and Three-Dimensional Methods
Source: MDPI journal article supplement (doi:10.3390/ijms242316760), 2023-11-25
Supplement: s1 [file s1]

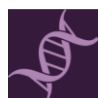

Supplementary Materials

# Thermodynamic Characterization of the Interaction of Biofunctionalized Gold Nanoclusters with Serum Albumin Using Two- and Three-Dimensional Methods

Ádám Juhász <sup>1,2,\*</sup>, Gyöngyi Gombár <sup>1,2</sup>, Egon F. Várkonyi <sup>1</sup>, Marek Wojnicki <sup>3</sup>, Ditta Ungor <sup>1</sup> and Edit Csapó <sup>1,2,\*</sup>

<sup>1</sup> Interdisciplinary Excellence Center, Department of Physical Chemistry and Materials Science, University of Szeged, H-6720 Rerrich B. sqr. 1, 6720 Szeged, Hungary; gygombar@gmail.com (G.G.); f.varkonyiegon@chem.u-szeged.hu (E.F.V.); ungord@chem.u-szeged.hu (D.U.)

<sup>2</sup> MTA-SZTE Lendület “Momentum” Noble Metal Nanostructures Research Group, University of Szeged, H-6720 Rerrich B. sqr. 1, 6720 Szeged, Hungary

<sup>3</sup> Faculty of Non-Ferrous Metals, AGH University of Science and Technology, Mickiewicza Ave. 30, 30-059 Krakow, Poland; marekw@agh.edu.pl

\* Correspondence: juhaszad@chem.u-szeged.hu (Á.J.); juhaszne@chem.u-szeged.hu (E.C.)

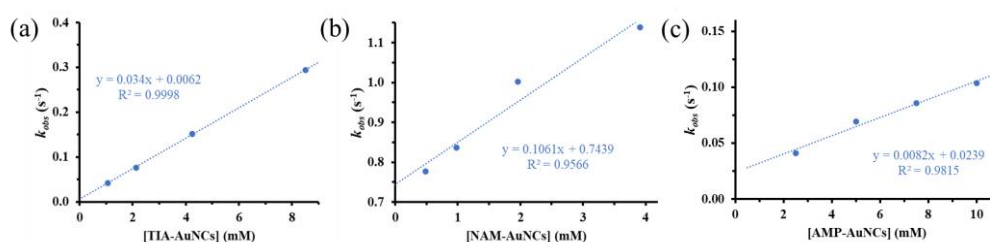

**Figure S1.** Determination of the real rate constants ( $k_a$  and  $k_d$ ) of the binding process to BSA based on the concentration dependence of the apparent rate constant ( $k_{obs}$ ) for TIA (a), NAM (b) and AMP (c) stabilized AuNCs.

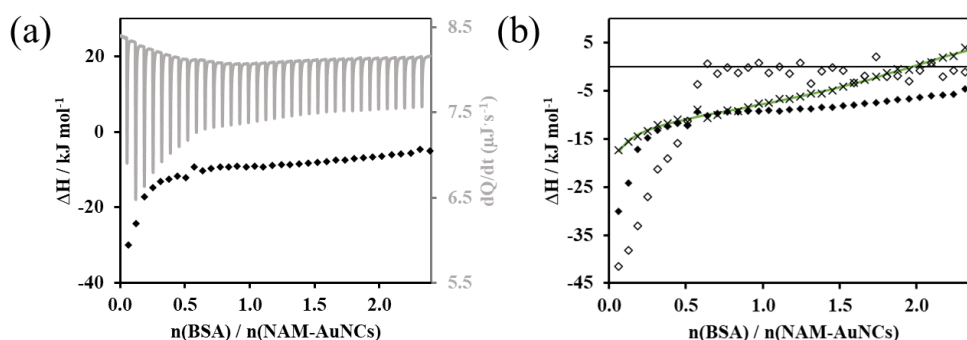

**Figure S2.** (a) Calorimetric curve (gray line) and enthalpogram (♦) recorded during the ITC examination of the BSA/NAM-AuNCs system; (b) Experimental- (♦), background- (◇) and dilution corrected- (×) enthalpogram fitted based on the model assuming two binding sites (green line).

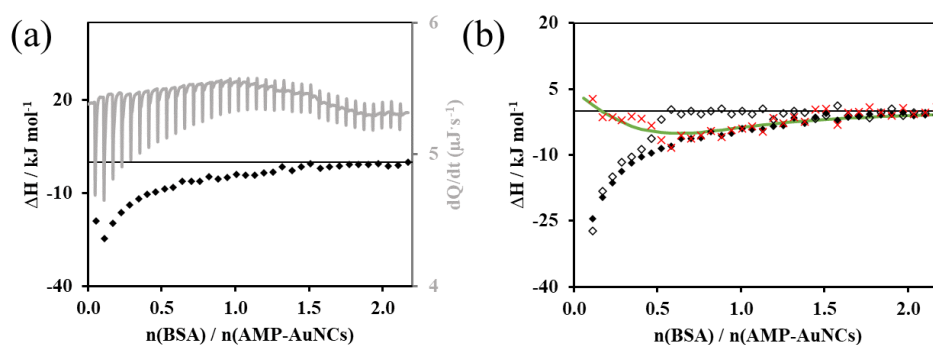

**Figure S3.** (a) Calorimetric curve (gray line) and enthalpogram (♦) recorded during the ITC examination of the BSA/NAM-AuNCs system; (b) Experimental- (♦), background- (◇) and dilution corrected- (×) enthalpogram fitted based on the model assuming two binding sites (green line).

**Table S1.** The value and standard deviation of the thermodynamic parameters determined based on the calorimetric (ITC) analysis of the interaction between TIA-AuNCs and BSA.

| $K_{a,1}$ ( $M^{-1}$ )                | $K_{a,2}$ ( $M^{-1}$ )                |
|---------------------------------------|---------------------------------------|
| $4.17 \cdot 10^4 \pm 9.20 \cdot 10^3$ | $1.04 \cdot 10^5 \pm 7.60 \cdot 10^4$ |
| $\Delta G_1$ ( $kJ \cdot mol^{-1}$ )  | $\Delta G_2$ ( $kJ \cdot mol^{-1}$ )  |
| $-26.36 \pm 0.55$                     | $-28.62 \pm 1.81$                     |
| $\Delta H_1$ ( $kJ \cdot mol^{-1}$ )  | $\Delta H_2$ ( $kJ \cdot mol^{-1}$ )  |
| $-230 \pm 181$                        | $1400 \pm 3600$                       |
| $N_1$                                 | $N_2$                                 |
| $1.19 \pm 0.14$                       | $0.29 \pm 0.18$                       |

**Table S2.** The value and standard deviation of the thermodynamic parameters determined based on the calorimetric (ITC) analysis of the interaction between NAM-AuNCs and BSA.

| $K_{a,1}$ ( $M^{-1}$ )                | $K_{a,2}$ ( $M^{-1}$ )                |
|---------------------------------------|---------------------------------------|
| $4.66 \cdot 10^5 \pm 6.90 \cdot 10^5$ | $2.12 \cdot 10^6 \pm 3.80 \cdot 10^6$ |
| $\Delta G_1$ ( $kJ \cdot mol^{-1}$ )  | $\Delta G_2$ ( $kJ \cdot mol^{-1}$ )  |
| $-32.34 \pm 3.67$                     | $-36.09 \pm 4.44$                     |
| $\Delta H_1$ ( $kJ \cdot mol^{-1}$ )  | $\Delta H_2$ ( $kJ \cdot mol^{-1}$ )  |
| $-5.58 \pm 8.98$                      | $-27.71 \pm 23.28$                    |
| $N_1$                                 | $N_2$                                 |
| $1.09 \pm 0.31$                       | $0.44 \pm 0.25$                       |

**Table S3.** The value and standard deviation of the thermodynamic parameters determined based on the calorimetric (ITC) analysis of the interaction between AMP-AuNCs and BSA.

| $K_{a,1}$ ( $M^{-1}$ )                | $K_{a,2}$ ( $M^{-1}$ )                |
|---------------------------------------|---------------------------------------|
| $1.64 \cdot 10^5 \pm 1.60 \cdot 10^5$ | $1.10 \cdot 10^6 \pm 2.80 \cdot 10^6$ |
| $\Delta G_1$ ( $kJ \cdot mol^{-1}$ )  | $\Delta G_2$ ( $kJ \cdot mol^{-1}$ )  |
| $-29.75 \pm 2.42$                     | $-34.47 \pm 6.31$                     |
| $\Delta H_1$ ( $kJ \cdot mol^{-1}$ )  | $\Delta H_2$ ( $kJ \cdot mol^{-1}$ )  |
| $-12.39 \pm 5.36$                     | $5.821 \pm 8.66$                      |
| $N_1$                                 | $N_2$                                 |
| $0.60 \pm 0.37$                       | $0.37 \pm 0.16$                       |

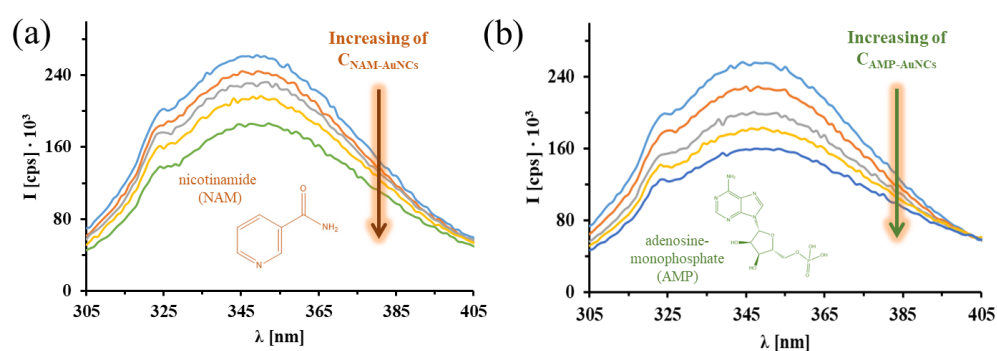

**Figure S4.** (a) Fluorescence emission spectra of the aqueous BSA solution and the protein/cluster mixtures after addition of 0–1 mM NAM-AuNCs with constant albumin concentration ( $C_{BSA} = 5.0 \mu\text{M}$ ;  $T = 25^\circ\text{C}$ ;  $\lambda_{\text{ex}} = 280 \text{ nm}$ ) (b) Fluorescence emission spectra of the aqueous BSA solution and the protein/cluster mixtures after addition of 0–1 mM AMP-AuNCs with constant albumin concentration ( $C_{BSA} = 5.0 \mu\text{M}$ ;  $T = 25^\circ\text{C}$ ;  $\lambda_{\text{ex}} = 280 \text{ nm}$ )

**Table S4.** The value and standard deviation of the thermodynamic parameters of the examined gold nanocluster-protein interactions, evaluated from SPR, ITC and PL measurement techniques.

|     |     | $K_a (\text{M}^{-1})$                 | $\Delta G (\text{kJ}\cdot\text{mol}^{-1})$ | $\Delta H (\text{kJ}\cdot\text{mol}^{-1})$ | $N$             | $\Delta S (\text{kJ}\cdot\text{mol}^{-1})$ |
|-----|-----|---------------------------------------|--------------------------------------------|--------------------------------------------|-----------------|--------------------------------------------|
| SPR | TIA | $5468 \pm 73$                         | $-21.32 \pm 0.03$                          |                                            |                 |                                            |
|     | NAM | $143 \pm 30$                          | $-12.29 \pm 0.53$                          |                                            |                 |                                            |
|     | AMP | $294 \pm 90$                          | $-14.08 \pm 0.76$                          |                                            |                 |                                            |
| ITC | TIA | $4.17 \cdot 10^4 \pm 9.20 \cdot 10^3$ | $-26.36 \pm 0.55$                          | $-230 \pm 182$                             | $1.19 \pm 0.14$ | $-682 \pm 4$                               |
|     | NAM | $4.66 \cdot 10^5 \pm 6.90 \cdot 10^5$ | $-32.34 \pm 3.67$                          | $-5.28 \pm 8.95$                           | $1.19 \pm 0.14$ | $91 \pm 13$                                |
|     | AMP | $1.64 \cdot 10^5 \pm 1.60 \cdot 10^5$ | $-34.47 \pm 2.42$                          | $-12.39 \pm 5.36$                          | $1.19 \pm 0.14$ | $58 \pm 19$                                |
| PL  | TIA | $1.85 \cdot 10^4 \pm 1.80 \cdot 10^3$ | $-24.35 \pm 0.24$                          |                                            | $1.19 \pm 0.14$ |                                            |
|     | NAM | $295 \pm 1$                           | $-14.09 \pm 0$                             |                                            | $1.19 \pm 0.14$ |                                            |
|     | AMP | $640 \pm 3$                           | $-16.12 \pm 0$                             |                                            | $1.19 \pm 0.14$ |                                            |
